# Supplementary material
Source: PubMed Central journal article supplement (PMC5982712)
Supplement: kwx372auchinclosswebmaterialfinal.pdf [file kwx372auchinclosswebmaterialfinal.pdf]

## **Associations of Bar and Restaurant Smoking Bans with Smoking Behavior in the CARDIA Study: A 25-Year Study**

Stephanie L. Mayne, Amy H. Auchincloss, Loni Philip Tabb, Mark Stehr, James M. Shikany, Pamela J. Schreiner, Rachel Widome, Penny Gordon-Larsen

### **Web Material**

Web Table 1. Comparison of Covariate Distribution between Imputed Sample and Original Sample

Web Appendix 1. Description of Conditional Poisson Fixed Effects Models

Web Figure 1. Plots from Generalized Additive Models with Penalized Cubic Regression Spline Smoothing Displaying Secular Time Trends for A) Current Smoking (Versus No Current Smoking), b) Smoking Intensity (Average Number of Cigarettes Smoked per Day, Continuous), and c) Quit Attempt (Any Versus None).

Web Appendix 2. Sensitivity to Temporal Stationarity

Web Table 2. (Sensitivity Analyses that Supplement Manuscript Table 2). Association of 100% Hospitality Smoking Bans<sup>a,b</sup> with Within-Person Change in Smoking Risk, Smoking Intensity, and Quit Attempts, The Coronary Artery Risk Development in Young Adults Study (1985–2011)-Sensitivity Analysis Adjusting for (1) Exposure by 6 months Rather than 1 Year, (2) Adjusting for Diagnosis with a Chronic Condition, (3) Evaluating Only State-level Smoking Bans, (4) Evaluating Smoking Intensity as a Count, and (5) Adjusting for Household Income as a Nonlinear Term.

Web Table 3. (Supplement to Manuscript Figure 1.) Comparison of Effect Modification Results Between Models Adjusting for Secular Trend as a Linear Time Trend or as a Nonlinear Time Trend, The Coronary Artery Risk Development in Young Adults Study (1985–2011)

**Web Table 1.** Comparison of Covariate Distributions between Imputed Sample and Original Sample

|                                    | Year 0          |                |                | Year 7          |                |                | Year 10         |                |                | Year 15         |                |                |
|------------------------------------|-----------------|----------------|----------------|-----------------|----------------|----------------|-----------------|----------------|----------------|-----------------|----------------|----------------|
|                                    | Original Sample |                | Imputed Sample |
|                                    | <i>N</i>        | % or Mean (SD) | % or Mean (SD) | <i>N</i>        | % or Mean (SD) | % or Mean (SD) | <i>N</i>        | % or Mean (SD) | % or Mean (SD) | <i>N</i>        | % or Mean (SD) | % or Mean (SD) |
| <b>Variables with Missing Data</b> |                 |                |                |                 |                |                |                 |                |                |                 |                |                |
| Education, years                   | 5,071           | 13.8 (2.3)     | 13.8 (2.3)     | 3,982           | 14.5 (2.5)     | 14.5 (2.5)     | 3,875           | 14.6 (2.6)     | 14.6 (2.6)     | 3,633           | 14.9 (2.5)     | 14.9 (2.5)     |
| No. missing                        | 0               |                |                | 24              |                |                | 20              |                |                | 11              |                |                |
| Marital Status                     |                 |                |                |                 |                |                |                 |                |                |                 |                |                |
| Married                            | 1,130           | 22             | 22             | 1,737           | 44             | 44             | 1,906           | 49             | 49             | 2,187           | 60             | 60             |
| Unmarried                          | 3,939           | 78             | 8              | 2,242           | 56             | 56             | 1,965           | 51             | 51             | 1,446           | 40             | 40             |
| No. missing                        | 2               |                |                | 27              |                |                | 24              |                |                | 11              |                |                |
| Employment Status                  |                 |                |                |                 |                |                |                 |                |                |                 |                |                |
| Unemployed                         | 1,405           | 28             | 28             | 900             | 23             | 23             | 814             | 21             | 21             | 732             | 20             | 20             |
| Employed                           | 3,664           | 72             | 72             | 3,081           | 77             | 77             | 3,057           | 79             | 79             | 2,899           | 80             | 80             |
| No. missing                        | 2               |                |                | 25              |                |                | 24              |                |                | 13              |                |                |
| Income, per \$10,000               | 4,237           | 5.7 (3.7)      | 5.5 (3.7)      | 3,927           | 4.7 (3.0)      | 4.7 (3.0)      | 3,852           | 4.9 (2.9)      | 4.9 (2.9)      | 3,596           | 6.9 (4.6)      | 6.9 (4.6)      |
| No. missing                        | 834             |                |                | 79              |                |                | 43              |                |                | 48              |                |                |
| Has children that live with them   |                 |                |                |                 |                |                |                 |                |                |                 |                |                |
| Yes                                | 1,355           | 27             | 27             | 1,934           | 49             | 49             | 2,110           | 55             | 55             | 2,174           | 60             | 61             |
| No                                 | 3,713           | 73             | 73             | 2,045           | 51             | 51             | 1,754           | 45             | 45             | 1,426           | 40             | 39             |
| No. missing                        | 3               |                |                | 27              |                |                | 31              |                |                | 44              |                |                |
| Current Alcohol Use                |                 |                |                |                 |                |                |                 |                |                |                 |                |                |
| Yes                                | 4,366           | 86             | 86             | 3,271           | 82             | 82             | 3,092           | 80             | 80             | 2,878           | 79             | 79             |
| No                                 | 688             | 14             | 14             | 717             | 18             | 18             | 780             | 20             | 20             | 758             | 21             | 21             |
| No. missing                        | 17              |                |                | 18              |                |                | 23              |                |                | 8               |                |                |

**Web Table 1 Continued.**

|                                    | Year 20         |                |                | Year 25         |                |                |
|------------------------------------|-----------------|----------------|----------------|-----------------|----------------|----------------|
|                                    | Original Sample |                | Imputed Sample | Original Sample |                | Imputed Sample |
|                                    | <i>N</i>        | % or Mean (SD) | % or Mean (SD) | <i>N</i>        | % or Mean (SD) | % or Mean (SD) |
| <b>Variables with Missing Data</b> |                 |                |                |                 |                |                |
| Education, years                   | 3,495           | 15.0 (2.6)     | 15.0 (2.6)     | 3,434           | 15.1 (2.7)     | 15.1 (2.7)     |
| No. missing                        | 15              |                |                | 12              |                |                |
| Marital Status                     |                 |                |                |                 |                |                |
| Married                            | 2,194           | 63             | 63             | 2,109           | 61             | 61             |
| Unmarried                          | 1,307           | 37             | 37             | 1,323           | 39             | 39             |
| No. missing                        | 9               |                |                | 14              |                |                |
| Employment Status                  |                 |                |                |                 |                |                |
| Unemployed                         | 780             | 22             | 22             | 1,123           | 33             | 33             |
| Employed                           | 2,721           | 78             | 78             | 2,306           | 67             | 67             |
| No. missing                        | 9               |                |                | 17              |                |                |
| Income, per \$10,000               | 3,459           | 6.8 (4.3)      | 6.8 (4.3)      | 3,391           | 6.3 (4.1)      | 6.3 (4.1)      |
| No. missing                        | 51              |                |                | 55              |                |                |
| Has children that live with them   |                 |                |                |                 |                |                |
| Yes                                | 2,012           | 58             | 58             | 1,703           | 50             | 50             |
| No                                 | 1,455           | 42             | 42             | 1,680           | 50             | 50             |
| No. missing                        | 43              |                |                | 63              |                |                |
| Current Alcohol Use                |                 |                |                |                 |                |                |
| Yes                                | 2,713           | 79             | 79             | 2,676           | 78             | 78             |
| No                                 | 723             | 21             | 21             | 739             | 22             | 22             |
| No. missing                        | 74              |                |                | 31              |                |                |

## WEB APPENDIX 1

### Description of Conditional Poisson Fixed-Effects Models

Models implemented in this analysis took the form:

$$\text{Log}(Y_{it}) = \beta_0 + \beta_1 \text{BAN}_{it} + \beta_2 I_{it} + \beta_3 S_{it} + \eta_c + \alpha_i + \varepsilon_{it}$$

Where:

$Y_{it}$  represents the outcome of interest (current smoking, smoking intensity, or quit attempt)

$\text{BAN}_{it}$  represents the time varying smoking ban exposure variable ( $\beta_1$  represents the coefficient of interest that is presented in the Results of Table 2)

$I_{it}$  represents a vector of time varying individual-level confounders (time since baseline, age, education, marital status, employment, income, living with children)

$S_{it}$  represents time-varying state cigarette tax

$\eta_c$  represents a fixed effect for state of residence

$\alpha_i$  represents the unobserved person-specific fixed effect

$\varepsilon_{it}$  represents the time varying individual level error

Models were implemented using the `xtpoisson` package in Stata version 13.1, with the “fe” and “vce(robust)” options. “fe” causes a fixed effects model to be implemented. The “robust” option causes a cluster-correlated robust variance estimate (the “Huber/White/sandwich estimator”) to be calculated, which corrects the variance for misspecification of the error term due to the binomial distribution of the outcome, accounts for clustering by participant, and is robust to serial correlation.

Reference:

StataCorp. 2013. *Stata 13 Longitudinal-Data/Panel-Data Reference Manual*. College Station, TX: Stata Press.

**Web Figure 1.** Plots from Generalized Additive Models with Penalized Cubic Regression Spline Smoothing Displaying Secular Time Trends for A) Current Smoking (Versus No Current Smoking), b) Smoking Intensity (Average Number of Cigarettes Smoked per Day, Continuous), and c) Quit Attempt (Any Versus None). Models were adjusted for smoking ban status, age, sex, race, education, inflation-adjusted income, marital status, employment status, living with children, current alcohol use, state cigarette tax. Plots created in R (R Foundation for Statistical Computing, Vienna, Austria) using the “mgcv” package. The solid line reflects the estimated change in each outcome over time using a fitted GAM, adjusted for covariates. The dotted lines reflect 95% confidence intervals. The graph can be interpreted as follows: for current smoking, in year 0, the predicted log odds of current smoking was 0.4 higher than the overall mean during the entire study period, conditional on covariates. In year 20, the predicted log odds of current smoking was -0.3 lower than the overall mean, conditional on covariates.

A) Current Smoking

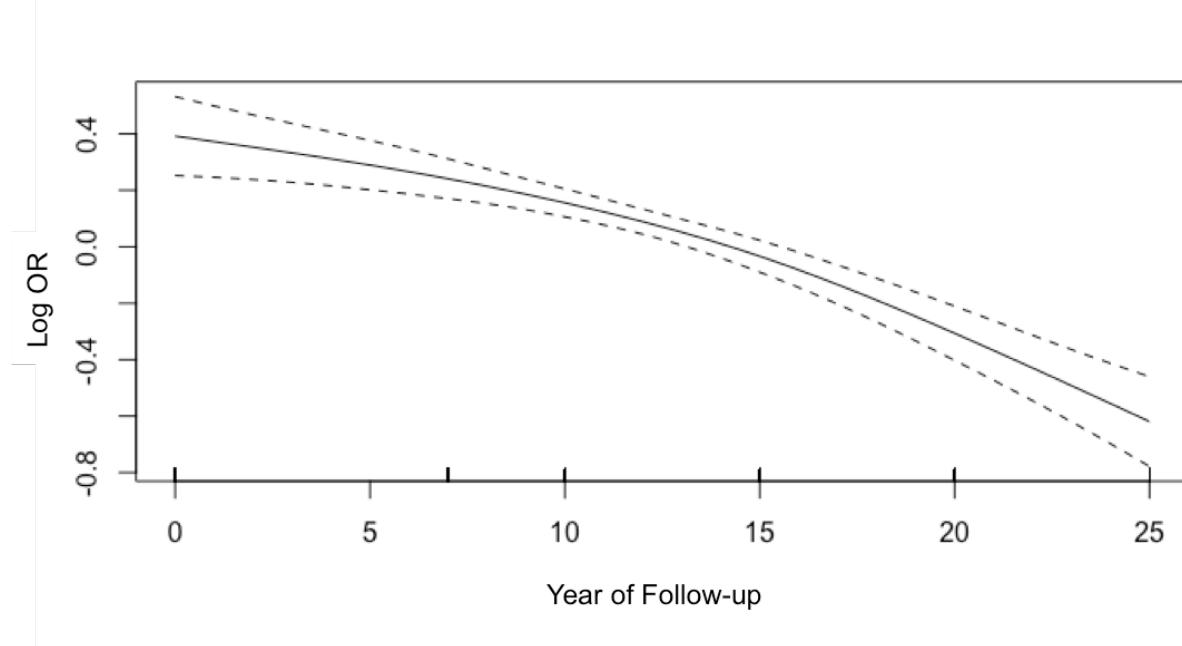

B) Smoking Intensity

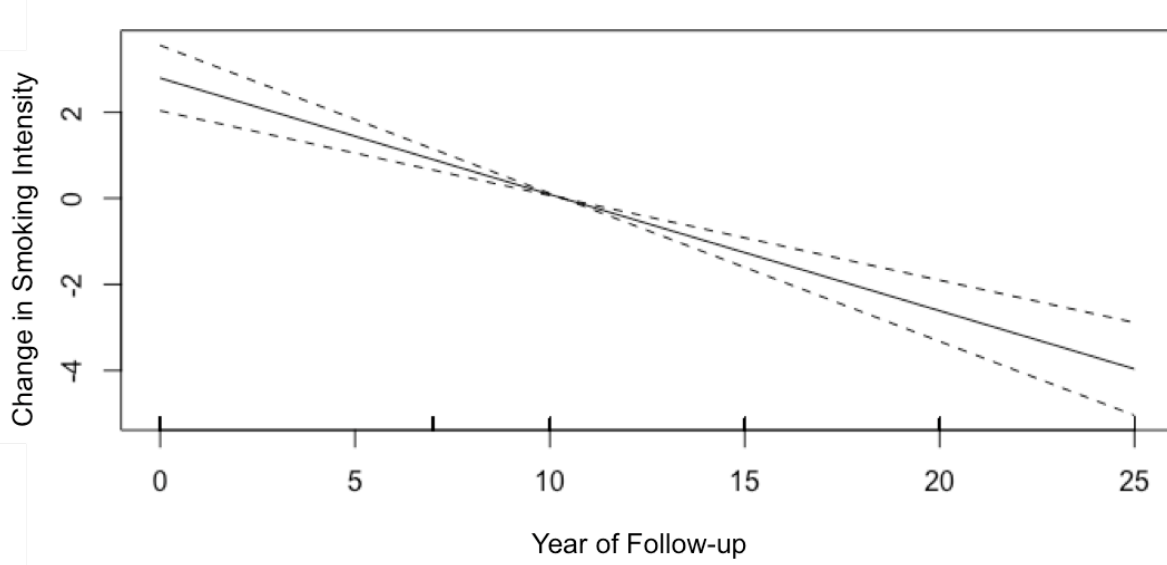

C) Quit Attempt

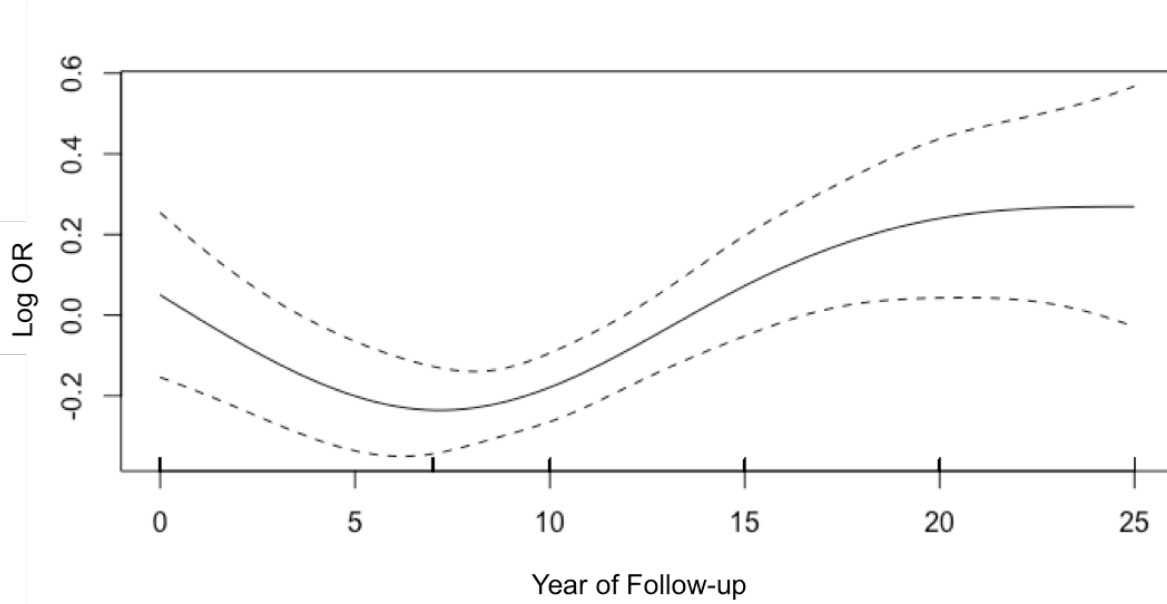

## WEB APPENDIX 2

### Sensitivity to Temporal Stationarity

Temporal stationarity of the independent and dependent variables and the errors from the smoking models was tested using the Harris-Tzavalis unit-root test, which is recommended when the number of panels is large and the number of time periods is small ( $T = 6$  in our analysis). We found no evidence that errors from the smoking models are temporally non-stationary ( $P < 0.0001$  when testing the null hypothesis that errors from the smoking models are non-stationary or contain a unit root).

#### References:

Harris, R. D. F., and E. Tzavalis. 1999. Inference for unit roots in dynamic panels where the time dimension is fixed. *Journal of Econometrics* 91: 201–226.

StataCorp. 2013. *Stata 13: STATA Panel Data Unit Root Tests*. College Station, TX: Stata Press. Available online at: <http://www.stata.com/features/overview/panel-data-unit-root-tests/> and <http://www.stata.com/manuals13/xtxtunitroot.pdf>

**Web Table 2.** (Sensitivity Analyses that Supplement Manuscript Table 2) Association of 100% Hospitality Smoking Bans<sup>a</sup> with Within-Person Change in Smoking Risk, Smoking Intensity, and Quit Attempts, The Coronary Artery Risk Development in Young Adults Study (1985–2011)-Sensitivity Analysis Adjusting for (1) Exposure by 6 months Rather than 1 Year, (2) Adjusting for Diagnosis with a Chronic Condition, (3) Evaluating Only State-Level Smoking Bans, (4) Evaluating Smoking Intensity as a Count, and (5) Adjusting for Household Income as a Nonlinear Term.

| Association of a 100% Hospitality Smoking Ban with:                                                                                                             | (1) Risk Ratio (95% CI) using a 6-month Exposure Lag <sup>b</sup> | (2) Risk Ratio (95% CI), Controlling for Diagnosis of Chronic Condition <sup>b</sup> | (3) Risk Ratio (95% CI) Evaluating Only State-Level Bans <sup>b</sup> | (4) Rate Ratio (95% CI) Evaluating Smoking Intensity as a Count <sup>c</sup> | (5) Risk Ratio (95% CI) Adjusting for Nonlinear Household Income <sup>b,d</sup>                |
|-----------------------------------------------------------------------------------------------------------------------------------------------------------------|-------------------------------------------------------------------|--------------------------------------------------------------------------------------|-----------------------------------------------------------------------|------------------------------------------------------------------------------|------------------------------------------------------------------------------------------------|
| Current smoking (versus not current smoking) ( <i>N</i> = 1,732)                                                                                                | 0.94 (0.88, 0.99)                                                 | 0.93 (0.87, 0.98)                                                                    | 0.92 (0.87, 0.98)                                                     | ---                                                                          | ---                                                                                            |
| Smoking intensity (average number of cigarettes smoked per day: ≥10 versus <10 per day) among participants who ever smoked during follow-up ( <i>N</i> = 1,197) | 0.92 (0.84, 1.01)                                                 | 0.92 (0.84, 1.01)                                                                    | 0.91 (0.82, 0.99)                                                     | ---                                                                          | ---                                                                                            |
| Quit attempt (any versus none) by current smokers ( <i>N</i> = 1,153)                                                                                           | 1.11 (1.01, 1.20)                                                 | 1.10 (1.01, 1.20)                                                                    | 1.08 (0.99, 1.17)                                                     | ---                                                                          | Income as cubic spline: 1.08 (0.99, 1.18)<br><br>Income as dummy variables: 1.09 (1.00, 1.19). |
| Smoking intensity (average number of cigarettes smoked per day) modeled as a count outcome ( <i>N</i> = 1,931)                                                  | ---                                                               | ---                                                                                  | ---                                                                   | 0.91 (0.83, 1.00)                                                            | ---                                                                                            |



<sup>a</sup> 100% smoking bans mandated that all bars and restaurants be completely smoke-free with no exceptions. Exposure was lagged by 6 months in column (1) and 1 year in columns (2)-(5) to ensure exposures preceded outcome ascertainment. In column (3), the exposure included only smoking bans that were implemented at the state level, while all other models evaluated exposure to bans implemented at the state, county, or local level.

<sup>b</sup> Estimated using fixed effects Poisson models. Models were adjusted for the following time-varying covariates: time since baseline, age, education, marital status, employment status, income, current alcohol use, state cigarette tax and state of residence. Interactions between time-invariant variables (sex and race) and time since baseline were retained for current smoking and smoking intensity to allow the associations of these variables with the outcome to change over time (p-value for interactions <0.05). Note-conditional fixed effects models only include participants with a change in the outcome over the follow-up period. In column (2), a variable that indicated whether participants had been diagnosed with a chronic condition that might necessitate quitting smoking (hypertension, diabetes, cancer, or heart disease).

<sup>c</sup> Estimated using hybrid effects negative binomial models (39). To construct these models, we decomposed the time-varying independent variables (smoking ban status, time since baseline, age, education, marital status, employment status, income, current alcohol use, state cigarette tax, and state of residence) into two components- a person-specific mean (which estimates between-person effects) and the deviation of each observation from the person-specific mean (which estimates within-person effects). We implemented a random effects negative binomial model with a random intercept for subject that included time-invariant predictors (sex, race, center) as well as the person-specific means and deviations for each time-varying predictor. As above, interactions between sex and race and time were included to allow the associations of these variables with the outcome to change over time (p-value for interactions <0.05). We compared the coefficients of the person-specific means and the deviations for each time-varying predictor using a Wald test. If the null hypothesis was not rejected, there was no evidence that these associations differed and following recommended practice, we retained the within-person component only. The estimate presented in column (4) is the exponentiated deviation coefficient and confidence interval for the time-varying smoking ban exposure, controlling for the covariates listed above, and indicates that exposure to a smoking ban is associated with a 9% reduction in individual-level rate of cigarettes smoked per day.

<sup>d</sup> In order to better-control for confounding by income, a potential non-linear relationship between household income and smoking outcomes was explored via cubic splines (in adjusted generalized additive models) and dummy variables. Exploratory results found no evidence of non-linearity with smoking risk or intensity but there was a suggestion of non-linearity with quit attempts. Thus we present results where income was entered into the model as a cubic spline (9 knots to correspond to the 9 income categories) rather than as a linear term; and alternately as a series of dummy variables rather than a linear term. Results were virtually the same to when income was entered into the model as a linear term.

**Web Table 3.** (Supplement to Manuscript Figure 1) Comparison of Effect Modification Results<sup>a</sup> Between Models Adjusting for Secular Trend as a Linear Time Trend or as a Nonlinear Time Trend, The Coronary Artery Risk Development in Young Adults Study (1985–2011)

|                          | Current Smoking        |                         | Smoking Intensity      |                         | Quit Attempts          |                         |
|--------------------------|------------------------|-------------------------|------------------------|-------------------------|------------------------|-------------------------|
|                          | Risk Ratio<br>(95% CI) |                         | Risk Ratio<br>(95% CI) |                         | Risk Ratio<br>(95% CI) |                         |
|                          | Linear Time<br>Trend   | Nonlinear Time<br>Trend | Linear Time<br>Trend   | Nonlinear Time<br>Trend | Linear Time<br>Trend   | Nonlinear Time<br>Trend |
| Educational Attainment   |                        |                         |                        |                         |                        |                         |
| ≤High School Degree      | 0.98 (0.91, 1.05)      | 1.04 (0.96, 1.13)       | 0.96 (0.85, 1.08)      | 1.03 (0.91, 1.18)       | 1.12 (1.00, 1.25)      | 1.06 (0.94, 1.20)       |
| Some College/Associate's | 0.96 (0.87, 1.06)      | 1.02 (0.92, 1.13)       | 0.95 (0.82, 1.11)      | 1.02 (0.88, 1.19)       | 1.15 (1.02, 1.29)      | 1.08 (0.95, 1.23)       |
| ≥Bachelor's Degree       | 0.78 (0.69, 0.89)      | 0.84 (0.73, 0.96)       | 0.79 (0.64, 0.98)      | 0.86 (0.69, 1.07)       | 1.00 (0.85, 1.17)      | 0.93 (0.78, 1.10)       |
| <i>P</i> -interaction    | <0.001                 | <0.001                  | 0.2                    | 0.2                     | 0.2                    | 0.1                     |
| Sex                      |                        |                         |                        |                         |                        |                         |
| Men                      | 0.94 (0.86, 1.02)      | 1.00 (0.92, 1.10)       | 0.93 (0.82, 1.06)      | 1.01 (0.88, 1.16)       | 1.00 (0.90, 1.13)      | 0.94 (0.82, 1.07)       |
| Women                    | 0.92 (0.85, 0.99)      | 0.98 (0.89, 1.07)       | 0.90 (0.79, 1.03)      | 0.97 (0.84, 1.12)       | 1.18 (1.07, 1.30)      | 1.10 (0.99, 1.23)       |
| <i>p</i> -interaction    | 0.7                    | 0.6                     | 0.8                    | 0.7                     | 0.02                   | 0.01                    |
| Income                   |                        |                         |                        |                         |                        |                         |
| Quartile 1               | 0.98 (0.91, 1.06)      | 1.06 (0.97, 1.16)       | 0.93 (0.82, 1.06)      | 1.02 (0.89, 1.18)       | 1.23 (1.09, 1.38)      | 1.14 (1.01, 1.31)       |
| Quartile 2               | 0.93 (0.84, 1.04)      | 1.00 (0.89, 1.12)       | 0.92 (0.78, 1.08)      | 1.00 (0.84, 1.18)       | 1.05 (0.91, 1.22)      | 1.00 (0.86, 1.16)       |
| Quartile 3               | 0.83 (0.72, 0.95)      | 0.88 (0.76, 1.01)       | 0.89 (0.73, 1.08)      | 0.95 (0.78, 1.15)       | 0.98 (0.85, 1.14)      | 0.91 (0.78, 1.06)       |
| Quartile 4               | 0.90 (0.79, 1.02)      | 0.95 (0.82, 1.08)       | 0.90 (0.73, 1.11)      | 0.95 (0.77, 1.18)       | 1.07 (0.92, 1.25)      | 1.03 (0.88, 1.21)       |
| <i>P</i> -interaction    | 0.2                    | 0.07                    | 0.9                    | 0.6                     | 0.07                   | 0.2                     |

<sup>a</sup> Estimated using fixed effects Poisson models. Models were adjusted for the following time-varying covariates: age, education, marital status, employment status, income, current alcohol use, state cigarette tax, and state of residence. Secular time trends were controlled for as A) linear or B) non-linear (quadratic (time + time-squared) for current smoking and smoking intensity, restricted cubic splines with 6 knots for quit attempts) variables. Interactions between time-invariant variables (sex and race) and time since baseline were retained for current smoking and smoking intensity to allow the associations of these variables with the outcome to change over time (p-value for interactions <0.05). Note—conditional fixed effects models only include participants with a change in the outcome over the follow-up period.
